# Supplementary material for: Bipolar disorder-iPSC derived neural progenitor cells exhibit dysregulation of store-operated Ca2+ entry and accelerated differentiation
Source: PubMed Central journal article supplement (PMC11041787; doi:10.1038/s41380-023-02152-6), 2023-07-04
Supplement: 41380_2023_2152_MOESM1_ESM.pdf [file 41380_2023_2152_MOESM1_ESM.pdf]

1 Supplemental Information for:

2

3 **Bipolar disorder-iPSC derived neural progenitor cells exhibit dysregulation of store-**  
4 **operated Ca<sup>2+</sup> entry and accelerated differentiation**

5

6 Tristen Hewitt<sup>1,5,6</sup>, Begüm Alural<sup>1,6</sup>, Manali Tilak<sup>1</sup>, Jennifer Wang<sup>2</sup>, Natalina Becke<sup>1</sup>, Ellis  
7 Chartley<sup>1</sup>, Melissa Perreault<sup>3</sup>, Stephen J Haggarty<sup>2</sup>, Steven D Sheridan<sup>2</sup>, Roy H Perlis<sup>2</sup>, Nina  
8 Jones<sup>1</sup>, Nikolaos Mellios<sup>4</sup>, Jasmin Lalonde<sup>1\*</sup>

9

10 <sup>1</sup> Department of Molecular and Cellular Biology, University of Guelph, Guelph, ON, Canada

11 <sup>2</sup> Center for Quantitative Health, Center for Genomic Medicine and Department of Psychiatry,  
12 Massachusetts General Hospital, Boston, MA, 02114, USA

13 <sup>3</sup> Department of Biomedical Sciences, Ontario Veterinary College, University of Guelph, Guelph,  
14 ON, Canada

15 <sup>4</sup> Department of Neurosciences, University of New Mexico School of Medicine, Albuquerque,  
16 NM, USA

17 <sup>5</sup> Present address: Neuroscience Center, HiLIFE, University of Helsinki, Helsinki, Finland

18 <sup>6</sup> These authors contributed equally to this work.

19

20 \* To whom correspondence should be addressed: [jlalon07@uoguelph.ca](mailto:jlalon07@uoguelph.ca)

## 21 SUPPLEMENTARY MATERIAL AND METHODS

### 22 Cell culture

23 6-well culture plates were coated with Geltrex (Thermo Fisher Scientific, Waltham, MA) and  
24 stored at 4°C for up to 2 weeks. Plates were warmed at RT for 1 hour prior to seeding. NPCs were  
25 lifted using Accutase (Millipore Sigma, St. Louis, MO) and were seeded at  $5.0 \times 10^5$  NPCs per  
26 well unless otherwise stated. NPCs were cultured in Neural Expansion Medium containing 49%  
27 Neurobasal, 49% Advanced DMEM/F12 and 2% Neural Induction Supplement (NEM; Gibco) at  
28 37°C and 5% CO<sub>2</sub>.

29

### 30 Fluo-4 Ca<sup>2+</sup> imaging

31 HC and BD iPSC/NPCs were seeded ( $5.0 \times 10^5$  cells) onto Geltrex-coated 35 mm glass-bottom  
32 dishes (MatTek, Ashland, MA) 24 h prior to imaging, or differentiated for 2 and 8 weeks prior to  
33 imaging. Cells were loaded with 2 μM of the Ca<sup>2+</sup> sensitive acetoxymethyl ester (Fluo-4, AM;  
34 Thermo Fisher Scientific) diluted in an imaging solution containing 10 mM HEPES pH 7.3, 140  
35 mM NaCl, 5 mM KCl, 2 mM CaCl<sub>2</sub>, 1 mM MgCl<sub>2</sub>, and 10 mM glucose for 45 minutes. The cells  
36 were then washed and rested in the Ca<sup>2+</sup>-containing HEPES imaging solution for 20 minutes. They  
37 were then washed in a Ca<sup>2+</sup>-free HEPES imaging solution containing 10 mM HEPES pH 7.3, 140  
38 mM NaCl, 5 mM KCl, 3 mM MgCl<sub>2</sub>, and 10 mM glucose and incubated in 2 μM Thapsigargin  
39 (Tg; MilliporeSigma, Burlington, MA) diluted in the Ca<sup>2+</sup>-free HEPES solution for 10 minutes.  
40 For neurons differentiated for 2 or 8 weeks, a cocktail of inhibitors for L-type Ca<sup>2+</sup> channels (10  
41 μM nimodipine), AMPA/kainite receptors (10 μM CNQX) and NMDARs (50 μM APV) were  
42 added in addition to the Tg. Imaging was conducted using a Nikon Eclipse Ti2 (Nikon, Minato  
43 City, TYO) and a 40× objective. After 3 minutes of baseline fluorescence measurements at 1 frame

44 every 5 seconds, the Ca<sup>2+</sup>-free HEPES solution was replaced with the Ca<sup>2+</sup>-containing HEPES  
45 imaging solution with 2 μM Tg. For TRPC4/5 and NMDA inhibition, the imaging solutions with  
46 10 μM ML 204 (Tocris), 10 μM AC 1903 (Tocris), and 50 μM APV (Tocris), sequentially. 5  
47 minutes of imaging was conducted after each treatment. All experiments were performed at room  
48 temperature. Image processing and analysis was done using NIS Elements (Nikon, Minato City,  
49 TYO) and Microsoft Excel.

50

### 51 **Fura-2 Ca<sup>2+</sup> imaging**

52 For ratiometric Ca<sup>2+</sup> imaging, iPSC/NPCs were incubated in imaging solution with 2 μM of the  
53 Fura-2 AM dye (Thermo Fisher Scientific) similar to the Fluo-4 protocol but without addition of  
54 Tg after the last wash. Intracellular Ca<sup>2+</sup> concentration ([Ca<sup>2+</sup>]<sub>i</sub>) was estimated according to the  
55 following standard equation (1):

$$56 \quad [Ca^{2+}]_i = QK_d (R - R_{min}) / (R_{max} - R)$$

57 In this equation, R is the F<sub>340</sub>/F<sub>380</sub> fluorescence ratio while an in situ Fura-2 calibration session was  
58 done to estimate the values of R<sub>min</sub> and R<sub>max</sub>. Specifically, R<sub>min</sub> and R<sub>max</sub> were calculated from the  
59 fluorescence ratios with imaging solutions containing 1 mM EGTA + 2 μM ionomycin and 20 mM  
60 Ca<sup>2+</sup> + 2 μM ionomycin, respectively. For its part, Q was determined from the F<sub>min</sub>/F<sub>max</sub> ratio at  
61 380 nm and K<sub>d</sub> represents the apparent dissociation constant of Fura-2 binding to Ca<sup>2+</sup> (135 nM).  
62 In our hands, the values of these parameters were: R<sub>min</sub> = 0.225 ± 0.001, R<sub>max</sub> = 1.275 ± 0.009, and  
63 Q = 2.08.

64

65

66

**67 Puncta formation assay**

68 iPSC/NPCs ( $5.0 \times 10^5$  cells) were seeded onto Geltrex-coated 35 mm glass-bottom dishes  
69 (MatTek) 1 day prior to transfection with Lipofectamine 2000 (Thermo Fisher Scientific) as per  
70 the manufacturer's protocol. 48 hours after transfection the cells were incubated with  $2 \mu\text{M}$  Tg for  
71 10 minutes prior to imaging using a Nikon Eclipse Ti2 microscope. Image analysis, including total  
72 puncta count and cell area measurements, were conducted in ImageJ (NIH, Rockville, MD).

73

**74 Seahorse mitochondrial stress test**

75 To evaluate mitochondrial function in HC-iPSC/NPCs compared to BD-iPSC/NPCs, an XF Mito  
76 Stress Test was performed using the Agilent Seahorse XF Analyzer (Santa Clara, CA) as per the  
77 manufacturer's protocol. Media was made fresh using the Seahorse XF Base DMEM with added  
78  $2 \text{ mM}$  L-glutamine,  $10 \text{ mM}$  glucose and  $1 \text{ mM}$  sodium pyruvate (bicarbonate-free). 1 day before  
79  $1.5 \times 10^5$  cells/well for each NPC line were seeded onto 20 wells of a Geltrex-coated 24-well XF  
80 cell culture microplate (Seahorse Bioscience). The calibration plate was hydrated in a non- $\text{CO}_2$   
81  $37^\circ\text{C}$  incubator overnight. Basal oxygen consumption rate (OCR) and extracellular acidification  
82 rate (ECAR) were recorded 4 times in 20 mins, after which 3 different compounds were added  
83 sequentially ( $2 \mu\text{M}$  oligomycin,  $2 \mu\text{M}$  FCCP and  $0.5 \mu\text{M}$  antimycin A/rotenone) to measure the 4  
84 fundamental parameters of mitochondrial function and their derivatives: basal respiration,  
85 maximal respiration, ATP production, spare respiratory capacity and coupling efficiency. At the  
86 end of the experiment run, cell densities from each well were quantified by using crystal violet  
87 staining and used for normalization of the results.

88

89



**90 EdU assay**

91 The Click-iT EdU Cell Proliferation Kit for Imaging (Invitrogen) was used as per the  
92 manufacturer's protocol. In brief, NPCs were plated onto Geltrex-coated 24 well plates with  
93 coverslips and incubated for the prescribed amount of time (6 and 12 hours) under normoxia  
94 (humidified chamber; ambient O<sub>2</sub>, 5% CO<sub>2</sub>, and 37°C) and hypoxia (HypOxystation H35  
95 [HypOxygen, Frederick, MD]; 1% O<sub>2</sub>, 5% CO<sub>2</sub>, and 37°C) in 10 μM 5-ethynyl-2'-deoxyuridine  
96 (EdU). Importantly, EdU was added using a half media change (20 μM EdU in NEM) to avoid  
97 disturbing cell cycle kinetics. After incubation cells were fixed with 4% PFA for 15 minutes. Cells  
98 were then washed with PBS + 3% bovine serum albumin (BSA) and permeabilized with 0.5%  
99 Triton X-100 in PBS for 20 minutes. After another PBS + 3% BSA wash cells were incubated in  
100 the Click-iT reaction cocktail containing 86% Click-iT reaction buffer, 4% CuSO<sub>4</sub>, 0.24% Alexa  
101 Fluor-594 azide, and 10% reaction buffer additive for 30 minutes protected from light. The cells  
102 were washed with PBS + 3% BSA and stained with 4',6-diamidino-2-phenylindole (DAPI) for 15  
103 minutes before mounting the coverslips on glass slides with ProLong Diamond Antifade.

104 Images were captured on a Nikon Eclipse Ti2 microscope using the NIS Elements software.  
105 Analysis was conducted using ImageJ (NIH) as follows. After a threshold fluorescence was set the  
106 image was made binary and watershed was used to separate clumped cells. Particles between 150  
107 and 5,500 pixels were analyzed for a final count of total and EdU positive cells. Rate of  
108 proliferation was measured using EdU positive cells over total cell count.

109

**110 TUNEL assay**

111 The Roche *In Situ* Cell Death Detection Kit (Millipore Sigma) was used as per the manufacturer's  
112 protocol to assay cell viability between HC- and BD-NPCs under normoxia (ambient O<sub>2</sub>, 5% CO<sub>2</sub>,

113 and 37°C) and hypoxia (1% O<sub>2</sub>, 5% CO<sub>2</sub>, and 37°C). Briefly, after treatment, cells were fixed using  
114 4% PFA for 20 minutes. After permeabilization with 0.1% Triton-X for 2 mins, the cells were  
115 incubated in TUNEL reaction solution for 30 mins in the dark at 37°C with humidity. After a PBS  
116 rinse, cells were incubated in DAPI staining solution before being mounted onto slides for  
117 visualization as above.

118

### 119 **Neurosphere assay**

120 iPSC/NPCs were seeded at  $1.0 \times 10^4$  in ultra-low adhesion U-bottom 96 well plates (Corning) and  
121 were agitated at 75 rpm in NEM for 72 hours. Neurospheres were then transferred to Geltrex-  
122 coated 24-well plates and incubated in differentiation media for 72 hours. Phase contrast images  
123 were collected on a Nikon Eclipse Ti2 microscope before fixing the neurospheres in 4%  
124 paraformaldehyde (PFA) for 20 minutes.

125

### 126 **Immunocytochemistry**

127 Immunocytochemistry was carried out for neurospheres and 2D NPC cultures grown on Geltrex-  
128 coated coverslips in 24-well plates as previously described (2, 3). Imaging was done with a Nikon  
129 Eclipse Ti2 microscope and processing was conducted using ImageJ (NIH).

130

### 131 **Immunoblotting**

132 Cell protein lysates and immunoblotting were performed as previously described (3). For  
133 quantification of immunoblot data, the intensity of each band of interest was divided by the  
134 intensity of its respective loading control (GAPDH) to provide the normalized expression value  
135 used for statistical analysis.

**136 RNA-sequencing**

137 RNA was collected from each of the 6 cell lines at the NPC stage as follows. Approximately 1.0-  
138  $1.5 \times 10^6$  NPCs were harvested by manual scraping and pellets collected by centrifugation. Total  
139 RNA was extracted from cell pellets using the Qiagen miRNeasy mini kit with a 30  $\mu$ L RNase free  
140 water elution. Agilent Bioanalyzer QC was performed on a 1:100 dilution of the stock RNA using  
141 the Pico RNA chip. RNA samples with RIN scores greater than 7 were diluted to 40 ng/ $\mu$ L using  
142 concentrations measured with the Qubit HS RNA assay (Invitrogen). Sequencing libraries were  
143 prepared with the KAPA Stranded RNA-Seq Kit with RiboErase and sequenced on Illumina  
144 HiSeq4000 to achieve  $\sim$ 80M paired end, 100 base pair reads for each sample.

145 Quality control of the paired-end reads was done with FastQC (v0.11.9) and adaptor trimming  
146 using BBduk (v39.00). To account for bias in using a single publicly available RNA-seq data  
147 analysis package, we analyzed our results sequentially using multiple packages. First, reads were  
148 mapped onto the human genome (GRCh38) using Hisat2 v2.0.5 and counted using FeatureCounts  
149 v1.6.2 default parameters. Differential expression analysis was performed using the DESeq2  
150 v1.6.3 package. Reads were then mapped onto the hg38.p13 human genome (GENCODE release  
151 41) using STAR aligner (v2.7.10a with the 'alpha\_220207' patch). Here, differential expression  
152 analysis was performed using the DESeq2 (v1.34.0) and edgeR (v3.36.0) packages. Genes were  
153 labelled as significantly altered if adjusted  $p$ -value  $\leq 0.05$  and  $\log_2$  fold change  $\geq 2$  or  $\leq -2$ . The  
154 differentially expressed transcripts were then grouped by biological process using the  
155 GeneOntology online resource. Specific statistics can be found in the figure caption and in  
156 Supplementary File 1.

157

158

**159 Cerebral organoid generation and staining**

160 For preparation of cerebral organoids, iPSCs of all 6 cell lines were maintained in culture on  
161 rLaminin-521 (Corning, 354222) with Nutristem XF/FF Medium (Biological Industries, 05-100-  
162 1A). Cerebral organoids were generated from the iPSCs using the STEMdiff Cerebral Organoid  
163 Kit), according to the manufacturer's protocol (StemCell Technologies, Vancouver, BC). Briefly,  
164 embryoid bodies (EBs) were formed from  $9 \times 10^3$  iPSCs per/well by incubation with EB Seeding  
165 Medium in 96-well round-bottom ultra-low attachment plate (Corning, 7007) at 37°C for 5 days.  
166 On the day 5, Induction Medium was added and EBs were transferred to a 24-well plate and  
167 incubated for 2 days at 37°C. On the day 7, EBs were transferred into Matrigel droplets and  
168 incubated in Expansion Medium at 37°C for 3 days. On the 10<sup>th</sup> day, media was changed to  
169 Maturation Medium and the organoids were allowed to mature for 40-50 days at 37°C on an orbital  
170 shaker at 65 rpm. On day 20, 3  $\mu$ M YM58483 was added to select organoids for a 20 days chronic  
171 treatment. Once the organoids had reached maturity (day 40/50), they were frozen in a  
172 gelatin/sucrose solution for slicing. Organoids were sliced using a Leica CM1860 cryostat at a  
173 thickness of 20  $\mu$ m. Sections were then stained according to the immunocytochemistry procedure  
174 described above and imaged using a Nikon Eclipse Ti2 microscope.

175

**176 NanoString miRNA profiling**

177 The nCounter Human miRNA Expression Assay Kit v3 (Nanostring Technologies, Seattle, WA,  
178 USA) was used for miRNA profiling. This expression panel contains 799 probes that represent  
179 >95% of all human miRBase reads. RNA was collected as above from the six cell lines in addition  
180 to two others, GM08330 and GM05440, described previously (4). Briefly, 100 ng of total RNA  
181 was annealed to the nCounter miRNA Tag reagent, hybridized to the Reporter CodeSet, and run

182 on an nCounter Prep Station. The nSolver analysis software (NanoString Technologies) was used  
183 for normalization and analysis. Normalization was done by using the geometric mean of all  
184 miRNAs and controlling for negative control signals.

185

### 186 **Real-time quantitative PCR for miR-34a**

187 Expression levels of miR-34a and housekeeping miRNAs (RNU6B and SNORD\_95) were  
188 determined with predesigned TaqMan assays (Life Technologies, Foster City, CA). High-Capacity  
189 cDNA synthesis Kit with RNase inhibitor (Thermo Fisher Scientific) was used to synthesize cDNA  
190 from 500 ng of total RNA. RT-qPCR experiments were performed on a LightCycler<sup>®</sup>480  
191 Instrument (Roche, Germany) according to the manufacturer's instructions. miR-34a expression  
192 level in each sample was normalized to the geometric mean of RNU6B and SNORD\_95  
193 expressions. The  $2^{-\Delta\Delta C_T}$  method (5) was used to determine relative miRNA expression levels.

194

### 195 **Statistics**

196 All statistical figures are presented as mean  $\pm$  standard error of mean (SEM) unless otherwise  
197 stated. After testing for normality with Levene's test and equal variance with a Shapiro-Wilk test,  
198 the appropriate analysis was carried out. Comparison between 2 groups used two-tailed Student's  
199 *t*-test with Welch's correction when variance was unequal. Multiple comparisons were analyzed  
200 using an ANOVA when assumptions of normality and equal variance were met. The Mann-  
201 Whitney U test or Kruskal-Wallis test was used when these assumptions were violated. Any *p*-  
202 value of less than 0.05 was considered to be significant. All analysis was conducted using R.  
203 Specific statistical methods are described in the figure legends.

204

205 **SUPPLEMENTARY METHODS REFERENCES**

- 206 1. Grynkiewicz G, Poenie M, Tsien RY. A new generation of Ca<sup>2+</sup> indicators with greatly  
207 improved fluorescence properties. *J Biol Chem.* 1985;260:3440–3450.  
208
- 209 2. Lalonde J, Saia G, Gill G. Store-operated calcium entry promotes the degradation of the  
210 transcription factor Sp4 in resting neurons. *Sci Signal.* 2014;7(328):ra51.  
211
- 212 3. Lalonde J, Reis SA, Sivakumaran S, Holland CS, Wesseling H, Sauld JF, et al.  
213 Chemogenomic analysis reveals key role for lysine acetylation in regulating Arc stability. *Nat*  
214 *Commun.* 2017;8(1):1659.  
215
- 216 4. Bavamian S, Mellios N, Lalonde J, Fass DM, Wang J, Sheridan SD, et al. Dysregulation of  
217 miR-34a links neuronal development to genetic risk factors for bipolar disorder. *Mol Psychiatr.*  
218 2015;20(5):573–84.  
219
- 220 5. Livak KJ, Schmittgen TD. Analysis of relative gene expression data using real-time  
221 quantitative PCR and the 2(-Delta Delta CC(T)) method. *Methods.* 2001;25:402–408.  
222

223 **SUPPLEMENTARY FIGURES AND DATASET**224 **Figure S1.** HC-NPC and neuronal validation after iPSC induction and differentiation.225 **Figure S2.** Patient- and cell-specific  $\text{Ca}^{2+}$  influx measures.226 **Figure S3.** Disparity in SOCE persists through blocking TRPC4/5 and NMDARs.227 **Figure S4.** Example image showing distribution of STIM1 puncta before and after Tg treatment.228 **Figure S5.** Mitochondria function normally in BD-NPCs.229 **Figure S6.** TUNEL assay demonstrates no difference in rates of cell death between HC- and BD-  
230 NPCs under normoxic and hypoxic conditions.231 **Figure S7.** HC organoids grown under SOCE inhibition do not have developmental abnormalities.232 **Figure S8.** qPCR quantifying miR-34a levels in HC- and BD-NPCs and neurons over  
233 differentiation.234 **Supplementary Dataset 1.** RNA-sequencing comparing the transcriptome of HC- and BD-NPCs.235 **Supplementary Dataset 2.** Nanostring miRNA analysis in BD-NPCs and neurons compared to  
236 HC-NPCs and neurons differentiation for 2, 4, and 6 weeks.

237

A

| Cell line identifier | Experimental condition / Lithium responsiveness | Sex    | Age (years) |
|----------------------|-------------------------------------------------|--------|-------------|
| PSC-01-024           | Healthy control                                 | Female | 36          |
| PSC-01-185           | Healthy control                                 | Female | 37          |
| PSC-01-223           | Healthy control                                 | Male   | 45          |
| PSC-01-003           | BD - lithium responder                          | Male   | 51          |
| PSC-01-009           | BD - lithium non-responder                      | Male   | 52          |
| PSC-01-122           | BD - lithium non-responder                      | Female | 49          |

B

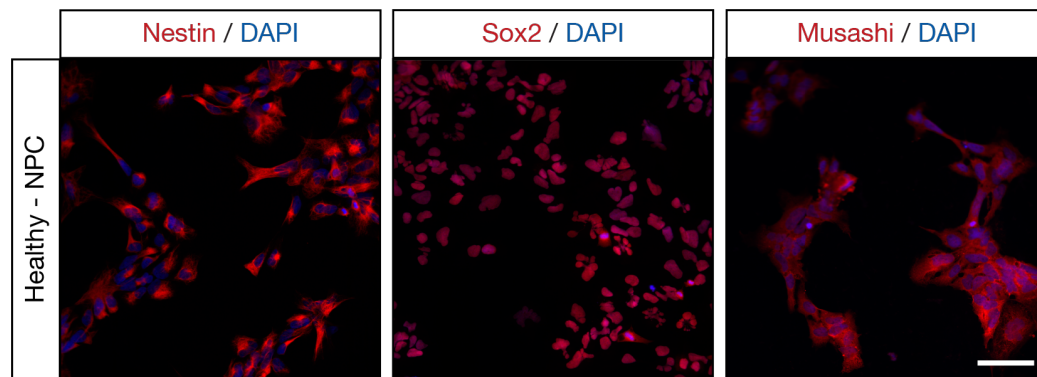

C

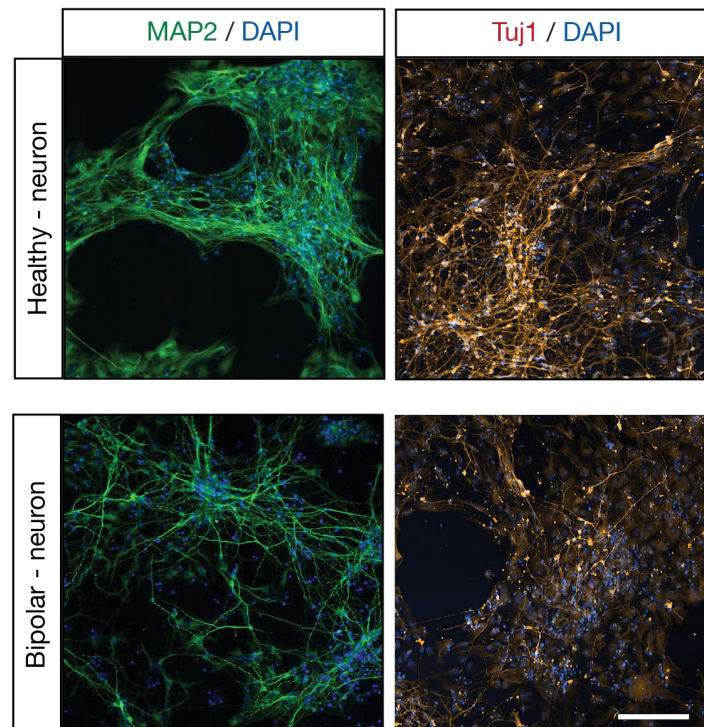



239 **Figure S1. HC-NPC and neuronal validation after iPSC induction and differentiation.** (A)  
240 Fibroblasts were collected through skin punch from 6 individuals, 3 of which were healthy controls  
241 (Cell line identifiers PSC-01-024/185/223) and 3 of which who were diagnosed with type I BD  
242 (Cell line identifiers PSC-01-003/009/122). These fibroblasts were reprogrammed with mRNA to  
243 iPSCs and then subsequently re-differentiated into NPCs. Of note, 1 of the BD patients was  
244 responsive to the mood stabilizer lithium while the other 2 were unresponsive. Due to this, the  
245 effects of lithium cannot be addressed in this research. (B) Representative fluorescent images from  
246 one HC-NPC line (PSC-01-024) outlining the expression of three markers of NPCs Nestin (left),  
247 Sox2 (middle) and Musashi (right). Nucleus is visualized with DAPI in all three micrographs. NPC  
248 status was confirmed for all other lines using the same staining. Scale bar represents 50  $\mu\text{m}$ . (C)  
249 The differentiation capabilities of the NPCs to differentiate into mature neurons was validated with  
250 staining of MAP2 and Tuj1 in healthy (representative image PSC-01-223) and BD (representative  
251 image PSC-01-003) lines up to and including 6 weeks of maturation. Scale bar represents 30  $\mu\text{m}$ .

252

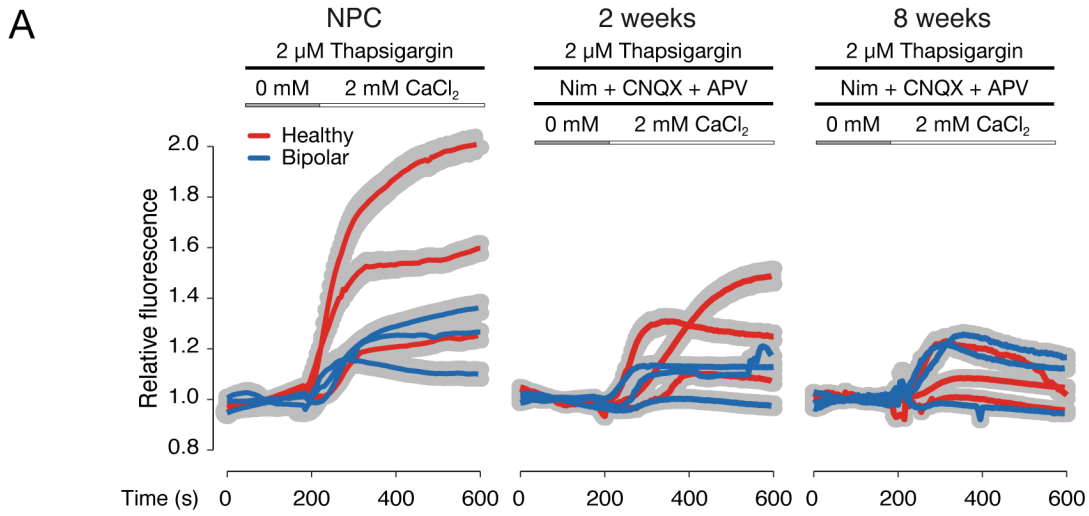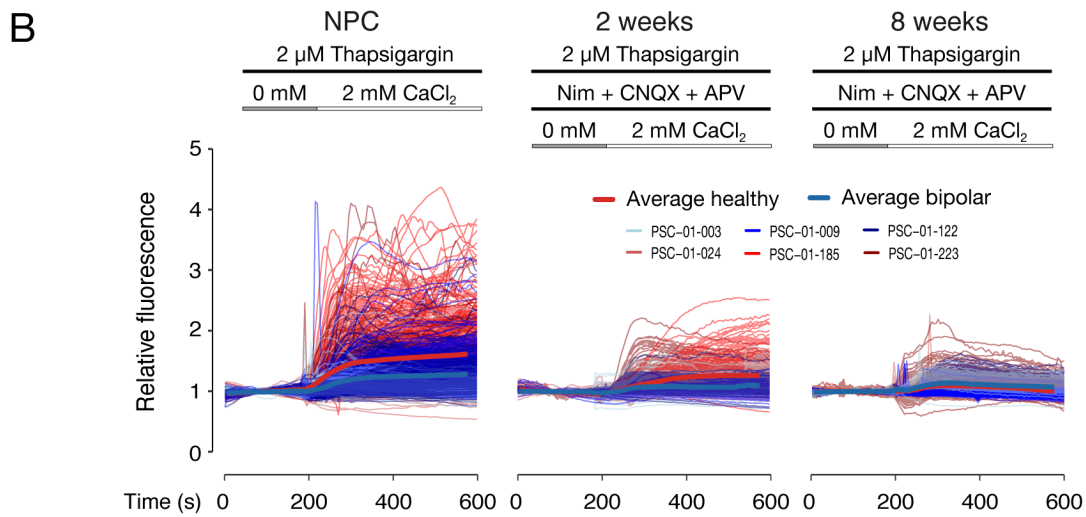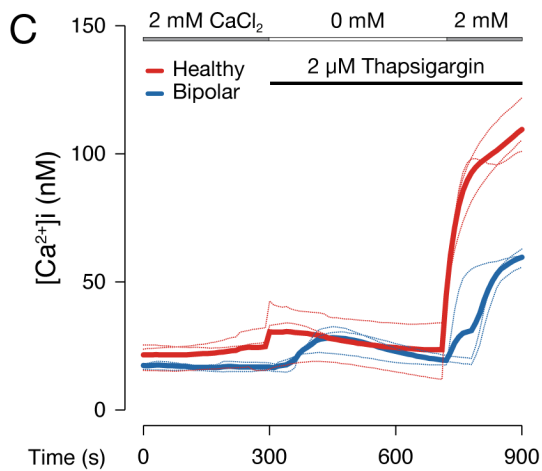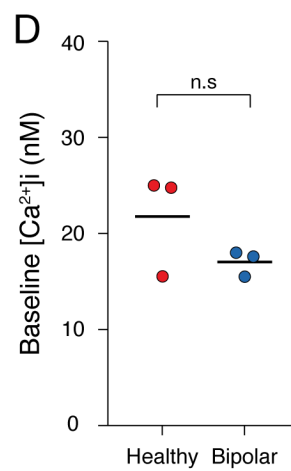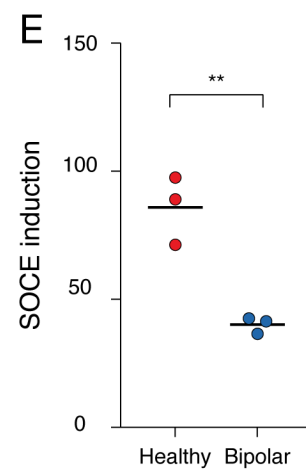

253

254 **Figure S2. Patient- and cell-specific Ca<sup>2+</sup> influx measures.** (A) Relative (Fluo-4) Ca<sup>2+</sup> imaging  
255 from Figure 1 was separated by individual cell line, showing average increase in fluorescence for  
256 each of the 3 HC and BD-NPCs and neurons after 2 and 8 weeks of differentiation. Data is  
257 presented as mean (red and blue curve)  $\pm$  s.e.m (grey ribbon). (B) Fluo-4 Ca<sup>2+</sup> imaging from Figure  
258 1 showing curves from each cell in all 6 cell lines, including PSC-01-003 (light blue), PSC-01-009  
259 (blue), PSC-01-122 (dark blue), PSC-01-024 (red), PSC-01-185 (light red), and PSC-01-223 (dark  
260 red). The same average shown in Figure 1 is given on top of these curves for HC- (red) and BD-  
261 (blue) NPCs and neurons differentiated for 2 and 8 weeks. (C-E) The experimental results at the  
262 NPC stage were confirmed with ratiometric Fura-2 imaging using all 6 cell lines (PSC-01-024:  $n$   
263 = 76; PSC-01-185:  $n$  = 80; PSC-01-223:  $n$  = 97; PSC-01-003:  $n$  = 51; PSC-01-009:  $n$  = 110; PSC-  
264 01-122:  $n$  = 60). (D) Baseline concentrations (0-180s) show no differences between HC- and BD-  
265 NPCs ( $t_4$  = 1.475,  $p$  = 0.21). (E) After acquiring baseline values, Tg was added and Ca<sup>2+</sup> was  
266 removed from the media, followed by the re-addition of Ca<sup>2+</sup> at 720s. Ca<sup>2+</sup> influx was measured  
267 as the difference between fluorescence at 900s and 720s. HC-NPCs had significantly higher Ca<sup>2+</sup>  
268 influx than BD-NPCs ( $t_4$  = 5.750,  $p$  = 0.0045).  
269

270

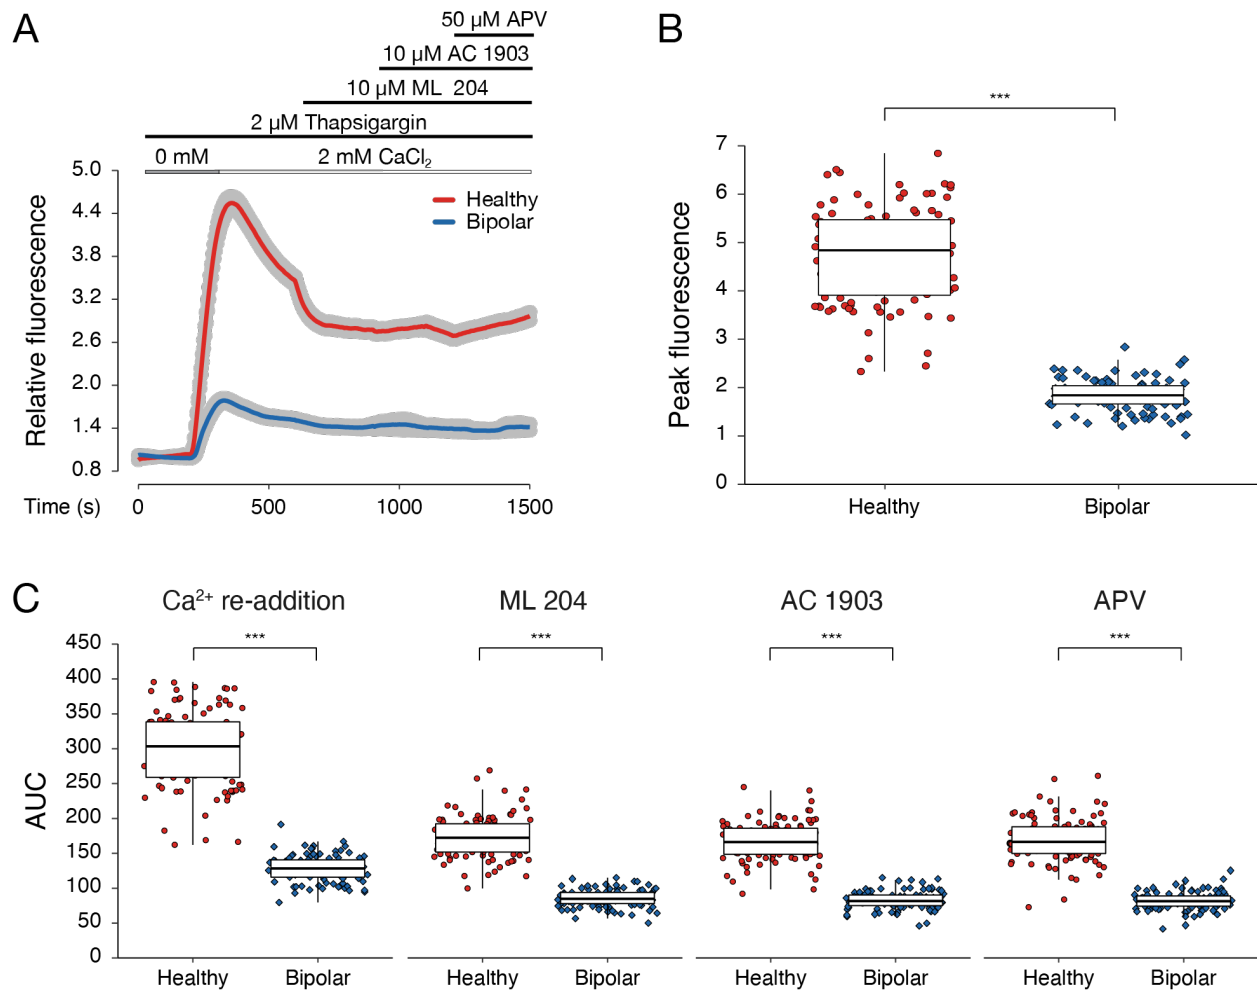

271

272 **Figure S3. Disparity in SOCE persists through blocking TRPC4/5 and NMDARs.** (A)  $\text{Ca}^{2+}$

273 imaging was performed as above for 10 minutes, followed by exchange with media containing 10

274  $\mu\text{M}$  ML 204, 10  $\mu\text{M}$  AC 1903, or 50  $\mu\text{M}$  APV for 5 minutes each. Data is presented as mean (red

275 and blue curve)  $\pm$  s.e.m (grey ribbon). Measurements were conducted on 100 cells from 1 HC line

276 (PSC-01-223) and 99 cells from 1 BD (PSC-01-003). (B) Peak overall fluorescence during

277 imaging. HC-NPCs had significantly higher peak fluorescence ( $W = 12$ ,  $p < 0.001$ ) than BD-

278 NPCs. (B) AUC analysis of SOCE specific  $\text{Ca}^{2+}$  influx, and decreases after inhibition with the

279  $\text{Ca}^{2+}$  channel blockers. HC-NPCs had significantly greater AUCs than BD-NPCs after  $\text{Ca}^{2+}$  re-

280 addition ( $W = 0.88$ ,  $p < 0.001$ ), after blocking TRPC4 with ML 204 ( $W = 0.92$ ,  $p < 0.001$ ), after

281 blocking TRPC5 with AC 1903 ( $W = 0.92, p < 0.001$ ), and after blocking NMDA with APV ( $W$   
282  $= 0.92, p < 0.001$ ). (C) Peak overall fluorescence during imaging. HC-NPCs had significantly  
283 higher peak fluorescence ( $W = 12, p < 0.001$ ) than BD-NPCs.

284

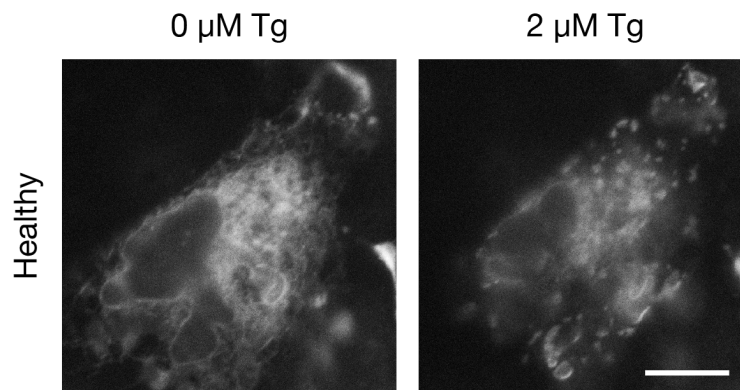

285  
286

287 **Figure S4. Example image showing distribution of STIM1 puncta before and after Tg**  
288 **treatment.** Before depleting ER stores with Tg, STIM1 has a qualitative dispersed distribution  
289 in the cell. After 10 minutes of 2 μM Tg treatment, this distribution shifts to punctate. Scale bar  
290 represents 10 μm.

291

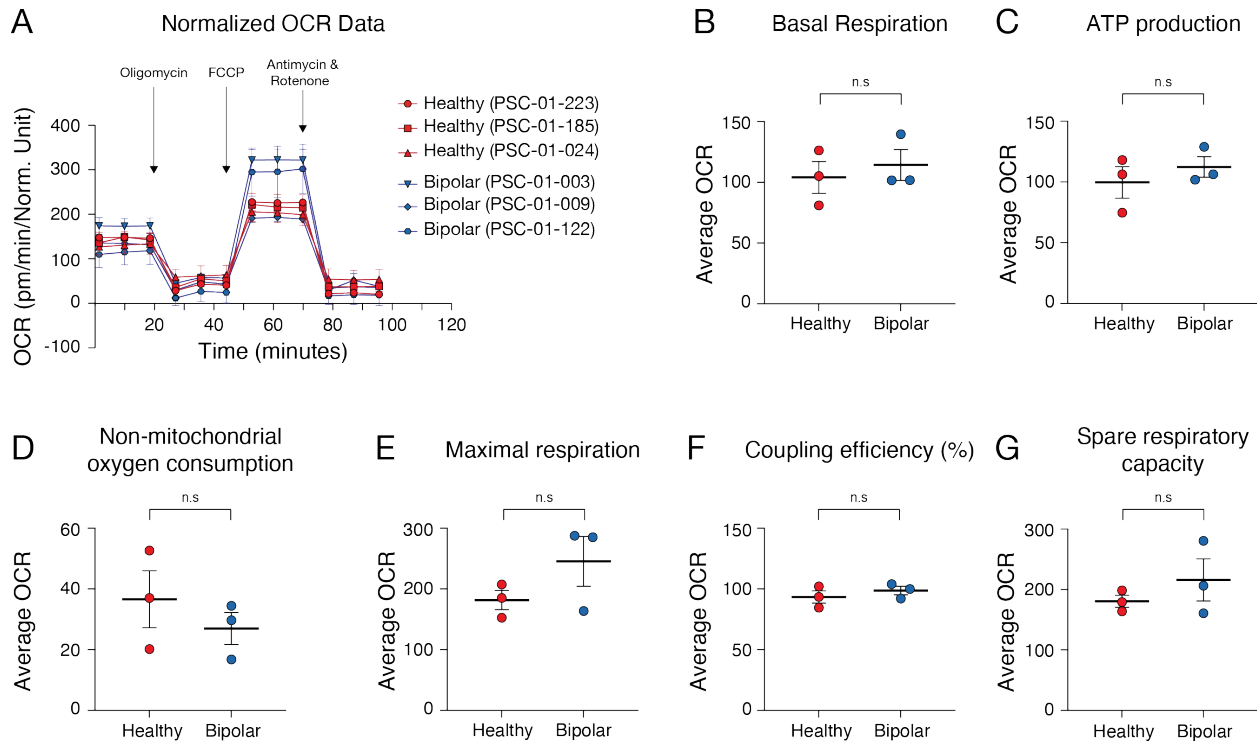

292

293 **Figure S5. Mitochondria function normally in BD-NPCs.** (A) A Seahorse mitochondrial stress

294 test was performed to measure the following parameters between HC-NPCs and BD-NPCs ( $n=3$ ):

295 (A) the real-time kinetic rate of oxygen consumption (OCR) and indication of the injection time

296 of the compounds, (B) basal respiration ( $t_4 = 0.5620$ ,  $p = 0.6041$ ), (C) ATP production ( $t_4 = 0.8225$ ,

297  $p = 0.4570$ ), (D) non-mitochondrial respiration ( $t_4 = 0.8966$ ,  $p = 0.4206$ ), (E) maximum respiration

298 capacity ( $t_4 = 1.452$ ,  $p = 0.2201$ ), (F) coupling efficiency ( $t_4 = 0.8670$ ,  $p = 0.4348$ ), and (G) spare

299 respiratory capacity ( $t_4 = 0.9724$ ,  $p = 0.3859$ ). As no significance was found between HC-NPCs

300 and BD-NPCs for any of these parameters, it can be concluded that mitochondria function is

301 consistent between these two groups. Data is presented as mean  $\pm$  s.e.m. n.s signifies  $p > 0.05$ ;

302 Student's  $t$ -test.

303

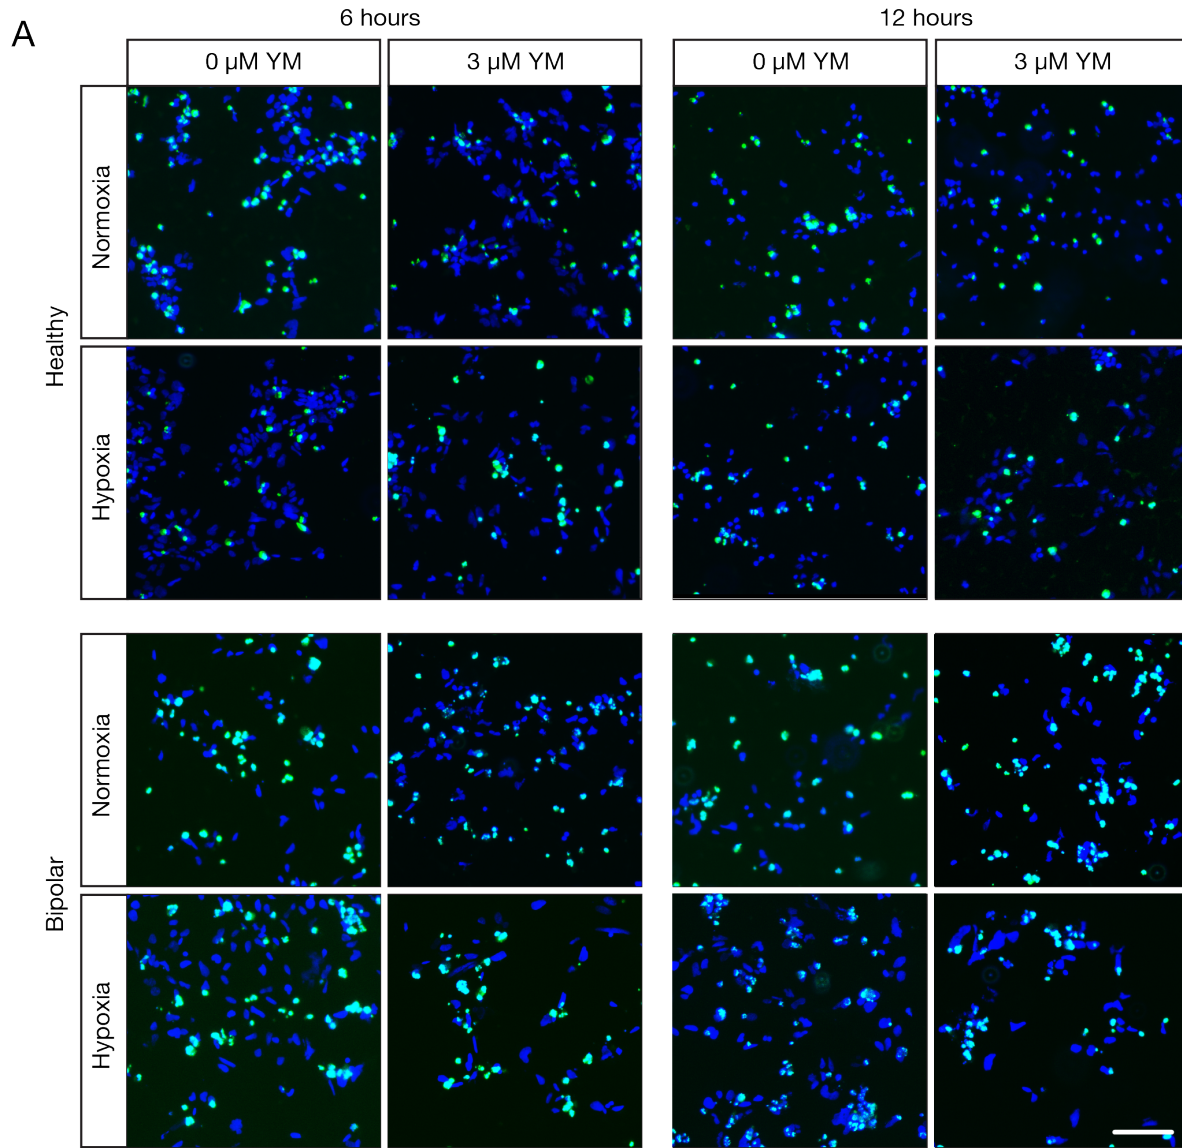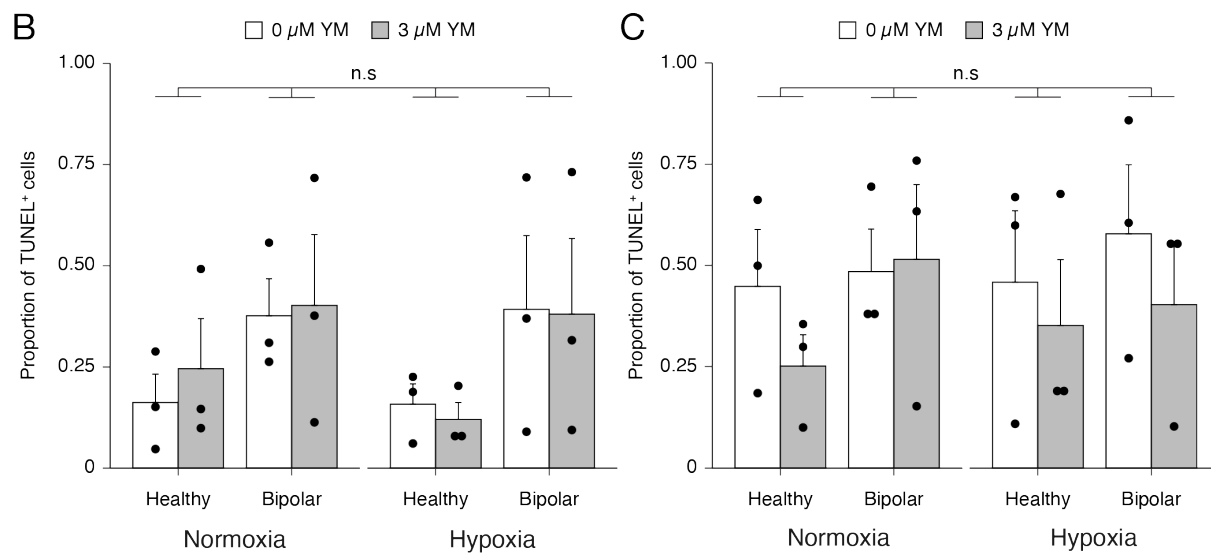



305

306 **Figure S6. TUNEL assay demonstrates no difference in rates of cell death between HC- and**307 **BD-NPCs under normoxic and hypoxic conditions.** (A) Representative immunofluorescent308 images of HC- and BD-NPCs without and with SOCE inhibition via 3  $\mu$ M YM58483 after 6 and

309 12 hours of incubation under normoxic and hypoxic conditions with double-stranded DNA breaks

310 visualized using TUNEL (green). DAPI is shown in blue. Scale bar represents 100  $\mu$ m. (B, C)311 Quantification of TUNEL<sup>+</sup> cells / DAPI after 6 and 12 hours of incubation under normoxia and

312 hypoxia to measure rate of cell death. No significant interaction effect was present for either 6

313 hours ( $F_{3,20} = 2.4, p = 0.094, n = 6$ ) or 12 hours ( $F_{3,20} = 0.51, p = 0.68, n = 6$ ). When testing main314 effects, BD-NPCs had significantly higher rates of cell death at 6 hours ( $F_{1,21} = 7.3, p = 0.013, n =$ 315 12), but this did not persist after 12 hours ( $F_{1,21} = 1.5, p = 0.23, n = 12$ ). Model testing was used to316 determine a lack of evidence to include YM58483 treatment to the model, and so results at 0  $\mu$ M317 and 3  $\mu$ M YM58483 treatment were pooled for both the 6- and 12-hour analyses. Data is presented318 as mean  $\pm$  s.e.m. n.s signifies  $p > 0.05$ ; ANOVA with Tukey's post hoc test when appropriate.

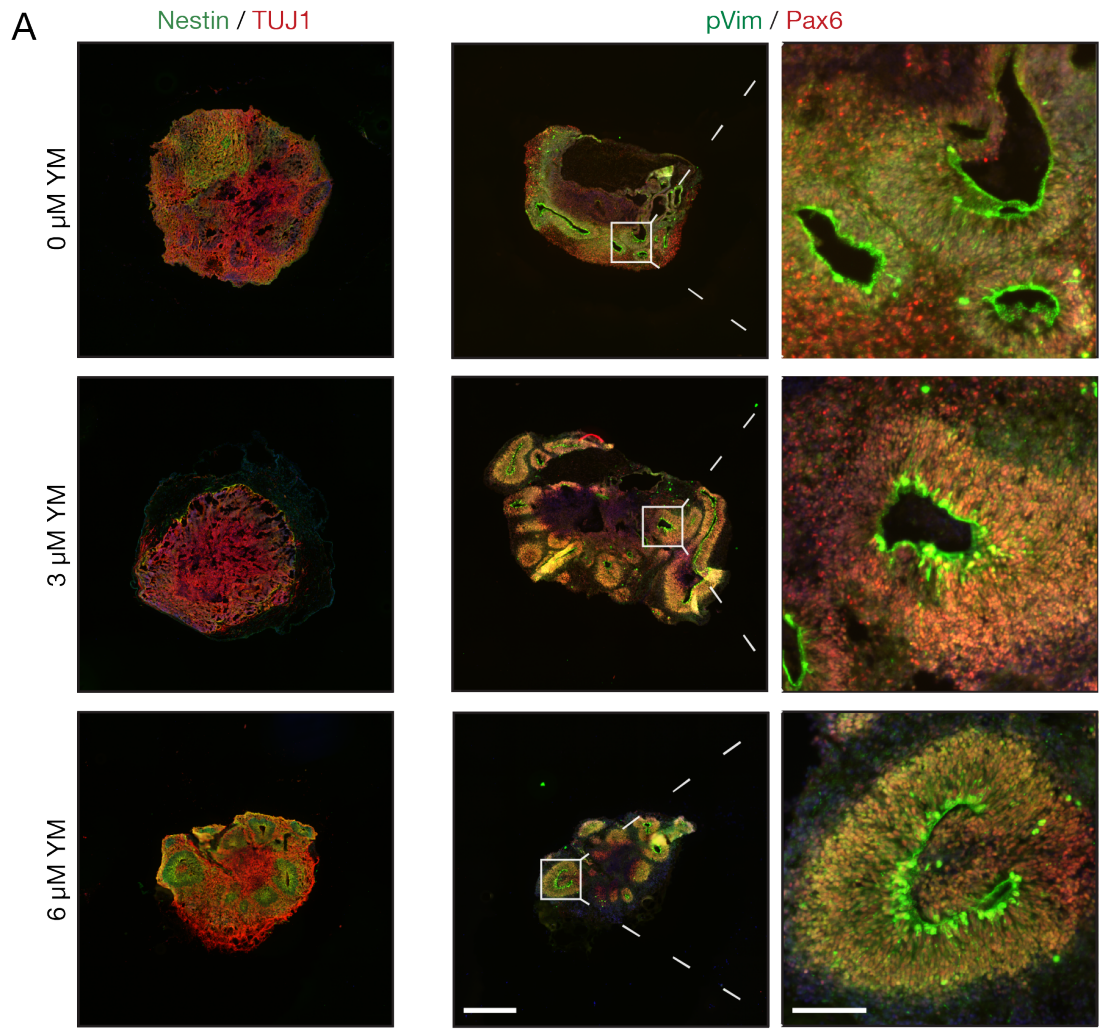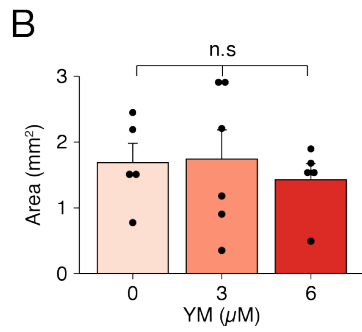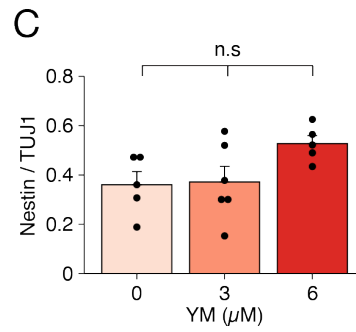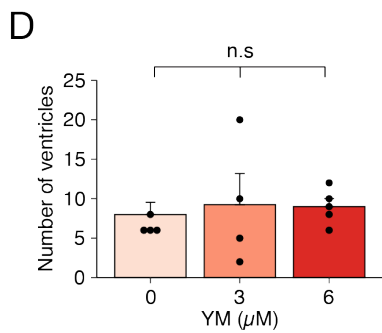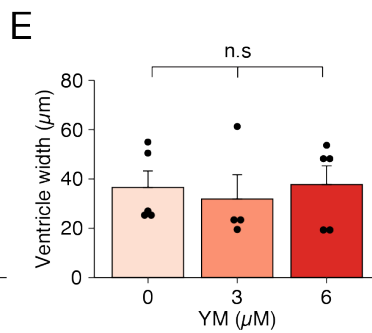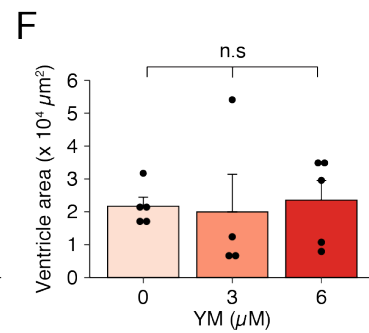

320 **Figure S7. HC organoids grown under SOCE inhibition do not have developmental**  
321 **abnormalities.** (A) Micrographs of a representative HC cell line matured to 40 days without or  
322 with 20 days exposure to YM58483. Organoids were co-stained for radial glia marker Nestin and  
323 immature neuron marker TUJ1 or for migration marker pVim and proliferation marker PAX6.  
324 Inlet shows an example SVZ. Scale bars represent 500  $\mu\text{m}$  and 100  $\mu\text{m}$ . (B) Average area of  
325 organoids. Significance was not reached for untreated ( $n = 5$ ) and treated (3  $\mu\text{M}$  YM,  $n = 6$ ; 6  $\mu\text{M}$   
326 YM,  $n = 5$ ) organoids ( $F_{2,13} = 0.22, p = 0.81$ ). (C) Ratio of Nestin/TUJ1 used to measure organoid  
327 maturity. No significant differences were observed ( $F_{2,13} = 2.89, p = 0.091$ ). (D) Number of  
328 ventricles quantified. Significance was not reached ( $F_{2,13} = 0.40, p = 0.68$ ). (E) Area of SVZ  
329 quantified. Significance was not reached ( $F_{2,11} = 0.068, p = 0.94$ ). (F) Width of ventricle.  
330 Significance was not reached ( $\chi^2 = 0.78, \text{df} = 2, p = 0.68$ ). Data is presented as mean  $\pm$  s.e.m. n.s  
331 signifies  $p > 0.05$ ; ANOVA with Tukey's post hoc test was used for parametric data. Kruskal-  
332 Wallis test was used for non-parametric data.

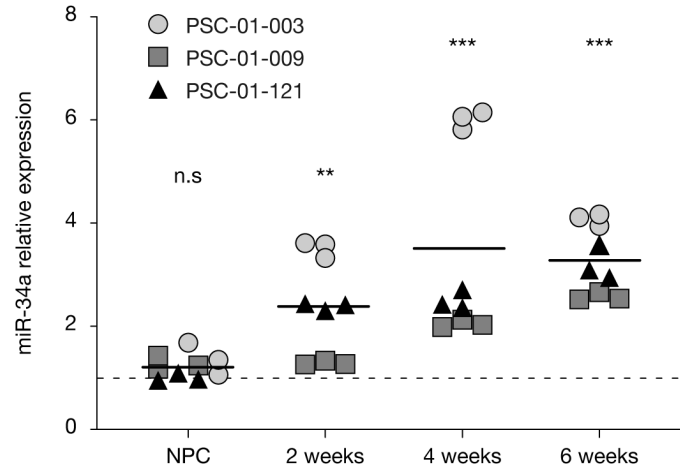

333

334

335 **Figure S8. qPCR quantifying miR-34a levels in HC- and BD-NPCs and neurons over**

336 **differentiation.** Cells were differentiated for 2, 4, and 6 weeks before RNA collection. For each

337 line, relative miR-34a expression was calculated by normalizing expression levels to HC-NPCs.

338 Shapes distinguish between cell lines: light grey represent PSC-01-003, dark grey represent PSC-

339 01-009, and black triangles represent PSC-01-121. Where miR-34a expression did not differ

340 between HC- and BD-NPCs ( $W = 32$ ,  $p = 0.49$ ,  $n = 9$ ), it did after 2 weeks ( $W = 6$ ,  $p = 0.0012$ ,  $n$

341  $= 9$ ), 4 weeks ( $W = 0$ ,  $p < 0.001$ ,  $n = 9$ ), and 6 weeks ( $W = 0$ ,  $p < 0.001$ ,  $n = 9$ ) weeks of

342 differentiation. Mean of all 9 replicates per differentiation time point is presented as a black bar.

343 n.s signifies  $p > 0.05$ , \*\*  $p < 0.01$ , \*\*\*  $p < 0.001$ ; Mann-Whitney U test.

344 **Supplementary Material and Methods**

| REAGENT or RESOURCE                                                                | SOURCE            | IDENTIFIER                       |
|------------------------------------------------------------------------------------|-------------------|----------------------------------|
| Antibodies                                                                         |                   |                                  |
| Rabbit anti-Stim1 at 1:1000                                                        | Alomone           | Cat. # ACC-063; RRID:AB_2039893  |
| Rabbit anti-STIM2 at 1:300                                                         | Alomone           | Cat. # ACC-064; RRID:AB_2040218  |
| Rabbit anti-ORAI1 at 1:300                                                         | Alomone           | Cat. # ACC-060; RRID:AB_2039844  |
| Rabbit anti-ORAI2 at 1:300                                                         | Alomone           | Cat. # ACC-061; RRID:AB_2040046  |
| Rabbit anti-ORAI3 at 1:800                                                         | Alomone           | Cat. # ACC-065; RRID:AB_10915896 |
| Rabbit anti-Nestin at 1:2000                                                       | Millipore Sigma   | Cat. # ABD69; RRID:AB_2744681    |
| Mouse anti-Tubulin $\beta$ 3 (TUBB3) at 1:1000                                     | BioLegend         | Cat. # 801201; RRID:AB_2313773   |
| Rabbit anti-PAX6 at 1:400                                                          | BioLegend         | Cat. # 901301; RRID:AB_2565003   |
| Mouse anti-phosphorylated vimentin (Ser55) at 1:1000                               | MBL Life Sciences | Cat. # D076-3; RRID:AB_592963    |
| Chicken anti-GAPDH at 1:100 000                                                    | Millipore Sigma   | Cat. # AB2302; RRID:AB_10615768  |
| Chemicals, Peptides, and Recombinant Proteins                                      |                   |                                  |
| Fluo-4, AM, cell permeant                                                          | Invitrogen        | Cat. # F14201                    |
| Geltrex™ LDEV-Free, hESC-Qualified, Reduced Growth Factor Basement Membrane Matrix | Gibco             | Cat. # A14133-02                 |
| StemPro™ Accutase™ Cell Dissociation Reagent                                       | Gibco             | Cat. # A6964                     |
| PSC Neural Induction Medium                                                        | Gibco             | Cat. # A1647801                  |
| Lipofectamine™ 2000 Transfection Reagent                                           | Invitrogen        | Cat. # 11668019                  |
| Protein Assay Dye Reagent Concentrate                                              | Bio-Rad           | Cat. # 5000006                   |
| Opti-MEM™ I Reduced Serum Medium                                                   | Gibco             | Cat. # 31985-062                 |
| Critical Commercial Assays                                                         |                   |                                  |
| Click-iT™ EdU Cell Proliferation Kit for Imaging, Alexa Fluor™ 488 dye             | Invitrogen        | Cat. # C10339                    |
| High-Capacity cDNA Synthesis Kit with RNase inhibitor                              | ThermoFisher      | Cat. # 4374966                   |
| miRNeasy mini kit                                                                  | QIAGEN            | Cat. # 217004                    |

|                                               |                       |                    |
|-----------------------------------------------|-----------------------|--------------------|
| nCounter Human miRNA Expression Assay Kit v3  | Nanostring            | Cat. # CSO-MIR3-12 |
| Roche <i>In Situ</i> Cell Death Detection Kit | Millipore Sigma       | Cat. # 11684795910 |
| Roche Stranded RNA-seq Kit with RiboErase     | KAPA                  | Cat. # 07962142001 |
| STEMdiff™ Cerebral Organoid Kit               | StemCell Technologies | Cat. # 08570       |
| STEMdiff™ Cerebral Organoid Maturation Kit    | StemCell Technologies | Cat. # 08571       |
| Deposited Data                                |                       |                    |
| RNA-sequencing                                | This paper            | UniProt            |
| Experimental Models: Cell Lines               |                       |                    |
| PSC-01-024                                    | This paper            | N/A                |
| PSC-01-185                                    | This paper            | N/A                |
| PSC-01-223                                    | This paper            | N/A                |
| PSC-01-003                                    | This paper            | N/A                |
| PSC-01-009                                    | This paper            | N/A                |
| PSC-01-122                                    | This paper            | N/A                |
| GM08330                                       | Bavamian et al., 2015 |                    |
| GM05440                                       | Bavamian et al., 2015 |                    |
